# Supplementary material
Source: PubMed Central journal article supplement (PMC4782964)
Supplement: NIHMS759163-supplement-SupFig2.pdf [file NIHMS759163-supplement-SupFig2.pdf]

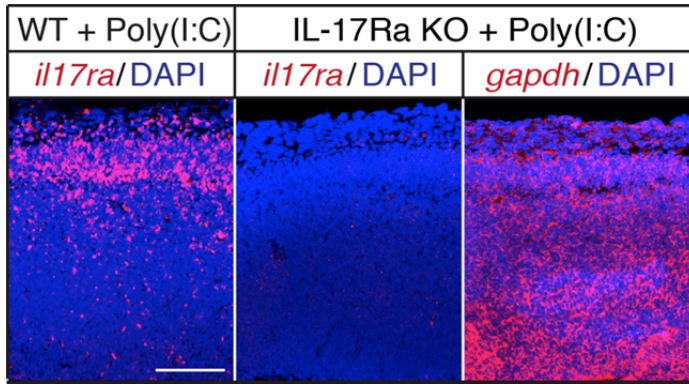

**Fig. S2. *In situ* hybridization for *Il17ra* in fetal brains.** *In situ* hybridization with an *il17ra* RNA probe in E14.5 WT mice (left) and IL-17Ra KO (middle) fetal brains derived from poly(I:C)-injected dams. Amplification control using *gapdh* RNA probe in E14.5 IL-17Ra KO fetal brain derived from poly(I:C)-injected dam (right). Scale bar represents 100  $\mu$ m.
