# Supplementary material
Source: PubMed Central journal article supplement (PMC4782964)
Supplement: NIHMS759163-supplement-SupFig9.pdf [file NIHMS759163-supplement-SupFig9.pdf]

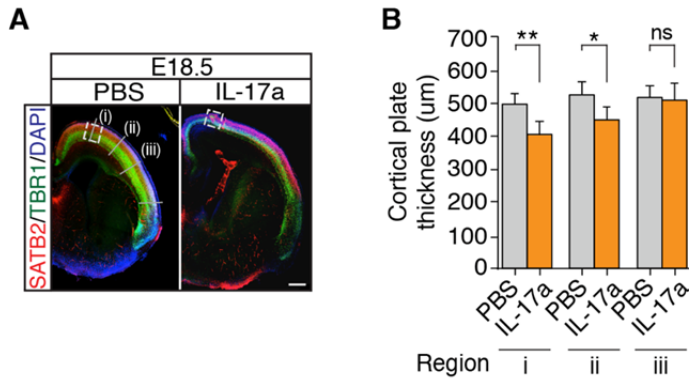

**Fig. S9. Characterization of the disorganized cortical patch from intra-ventricular administration of IL-17a.** (A) SATB2 and TBR1 staining of E18.5 fetal brains from animals treated as in (Fig. 4A). Images are representative of five independent experiments. (B) Thickness of the cortical plate in E18.5 fetal brains. (A and B) (i), (ii) and (iii) indicate subdivisions resulting from equally dividing the cortex perpendicularly through the cortical plate. Scale bar represents 100  $\mu\text{m}$ . (B) Student's t test. **\*\*** $P < 0.01$ , **\*** $P < 0.05$ , and ns; not significant. Graphs show mean  $\pm$  s.e.m.
